# Supplementary material
Source: PubMed Central journal article supplement (PMC8796698)

Differential expression analysis of murine pancreatic monocytes during AP and recovery

(A) Monocyte

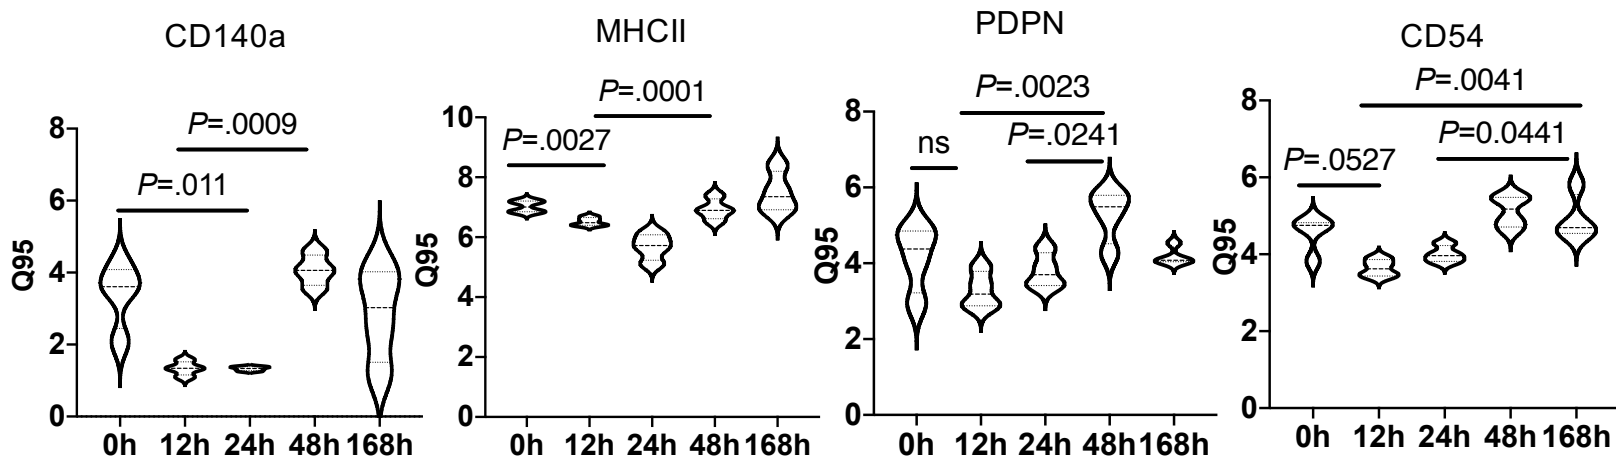

(B)

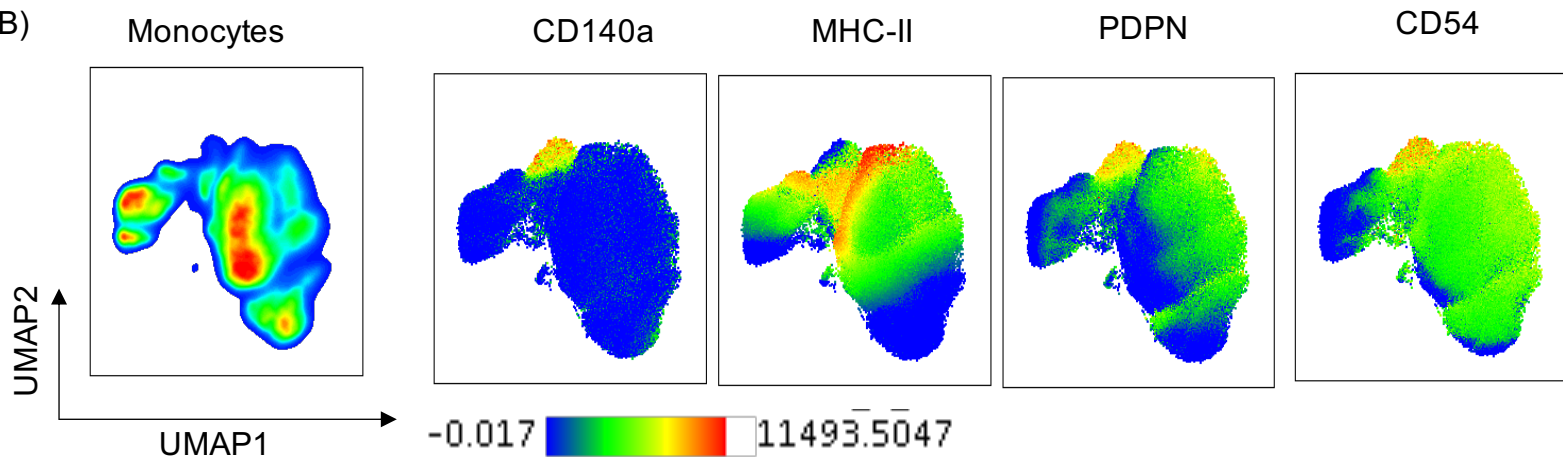

Supplement: NIHMS1735965-supplement-Suppl_Fig_1.pdf [file NIHMS1735965-supplement-Suppl_Fig_1.pdf]
