# Supplementary material
Source: PubMed Central journal article supplement (PMC8796698)

Differential expression analysis of murine pancreatic monocytes during CDE diet-induced severe AP

(A) Monocyte

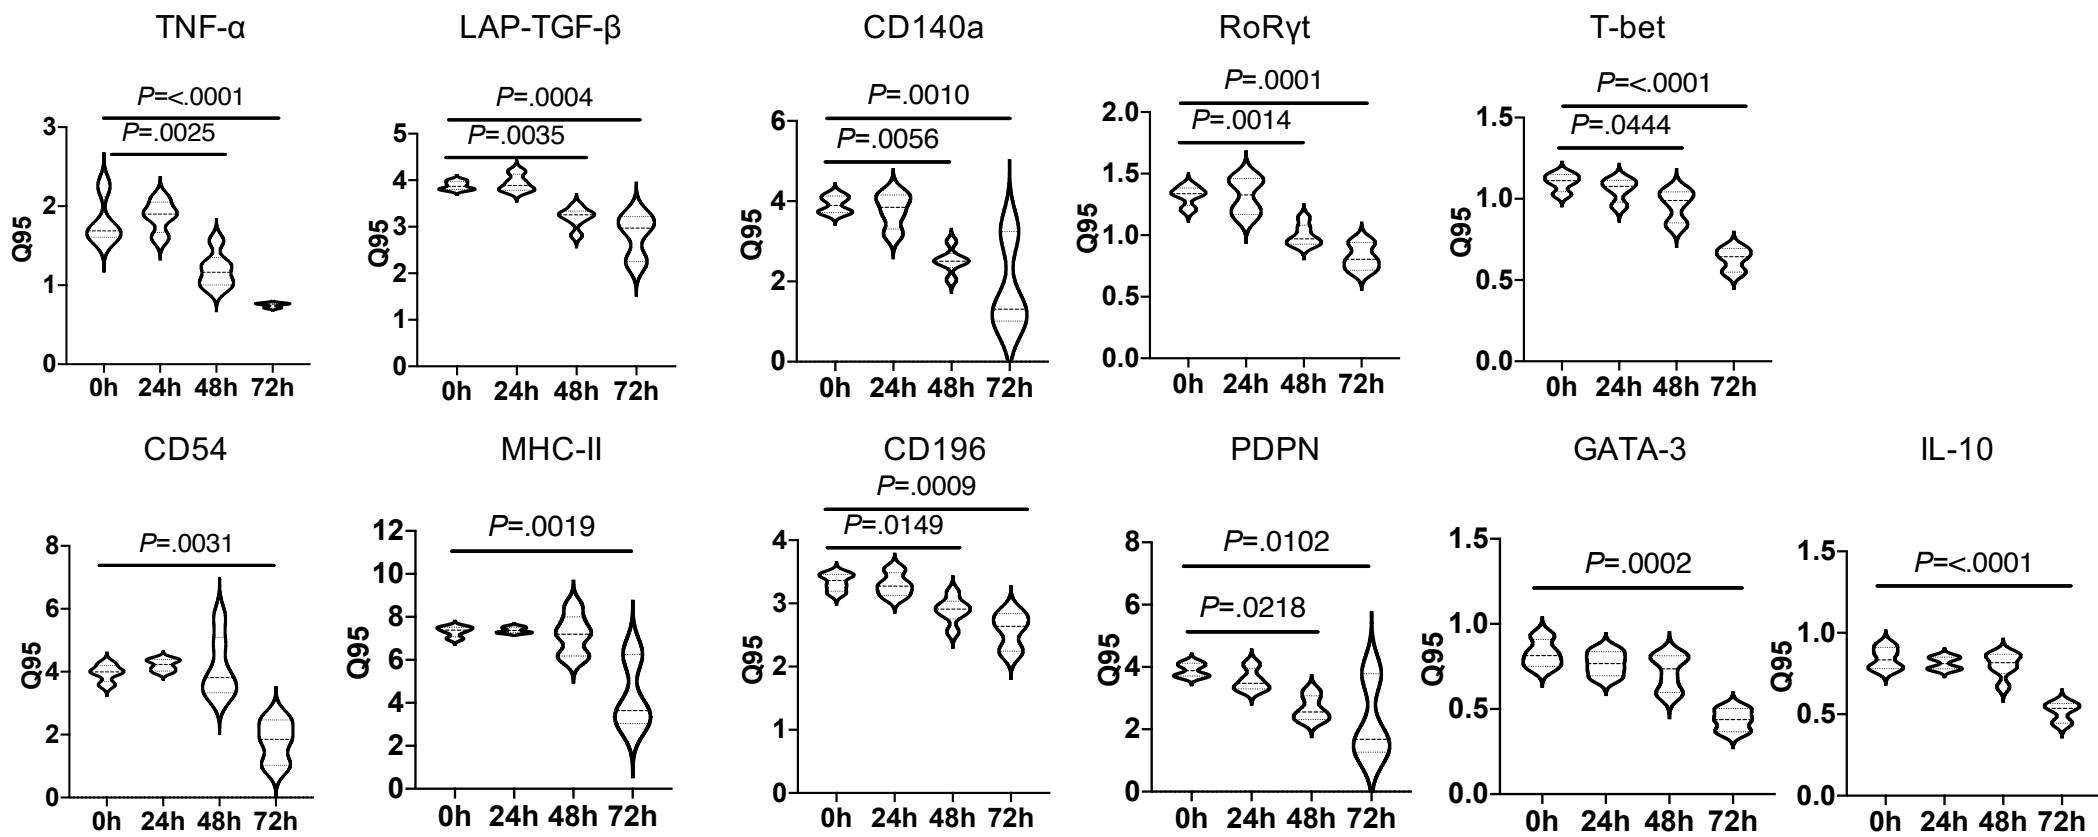

(B)

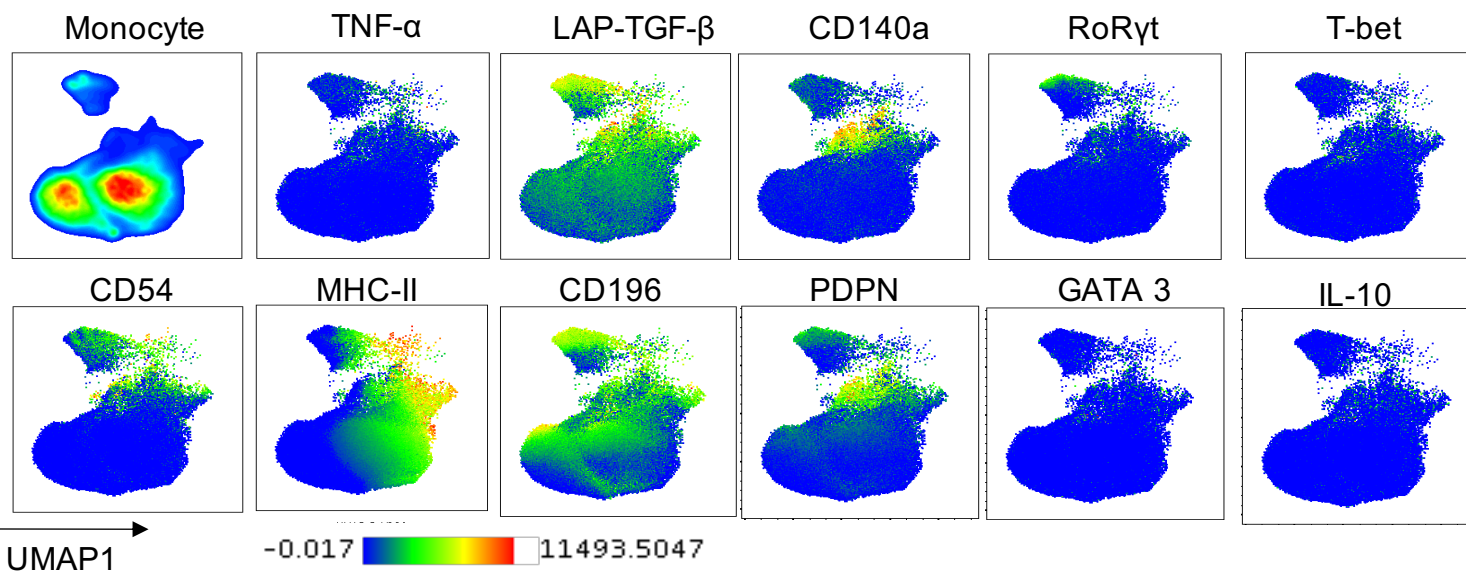

Supplement: NIHMS1735965-supplement-Suppl_Fig_2.pdf [file NIHMS1735965-supplement-Suppl_Fig_2.pdf]
