# Supplementary material
Source: PubMed Central journal article supplement (PMC8796698)

Differential expression analysis of murine circulatory monocytes during AP and recovery

(A) Monocytes

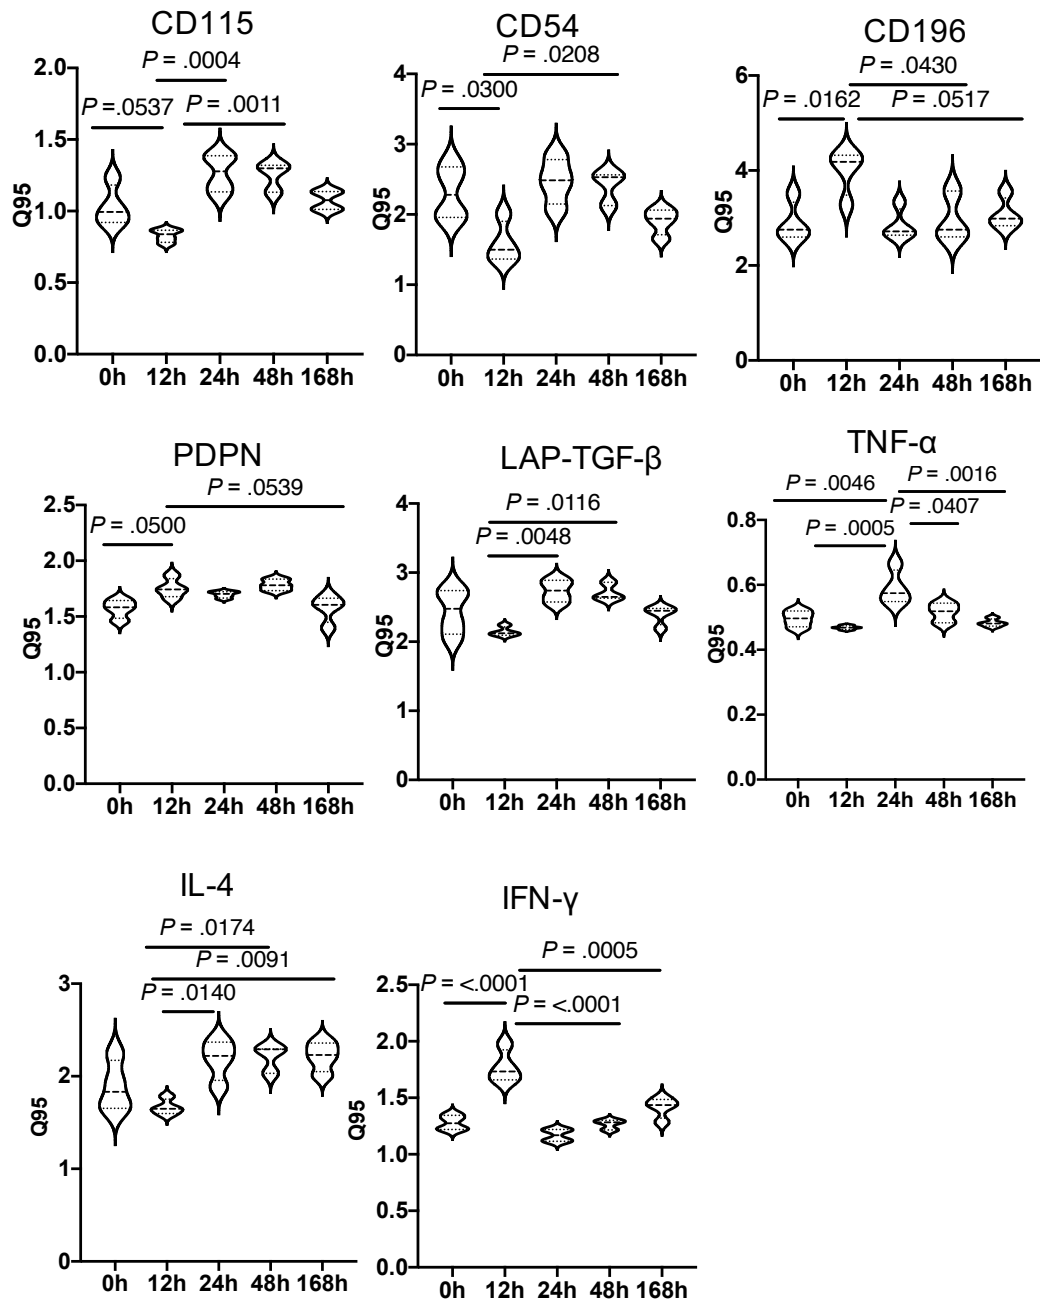

(B) Monocytes

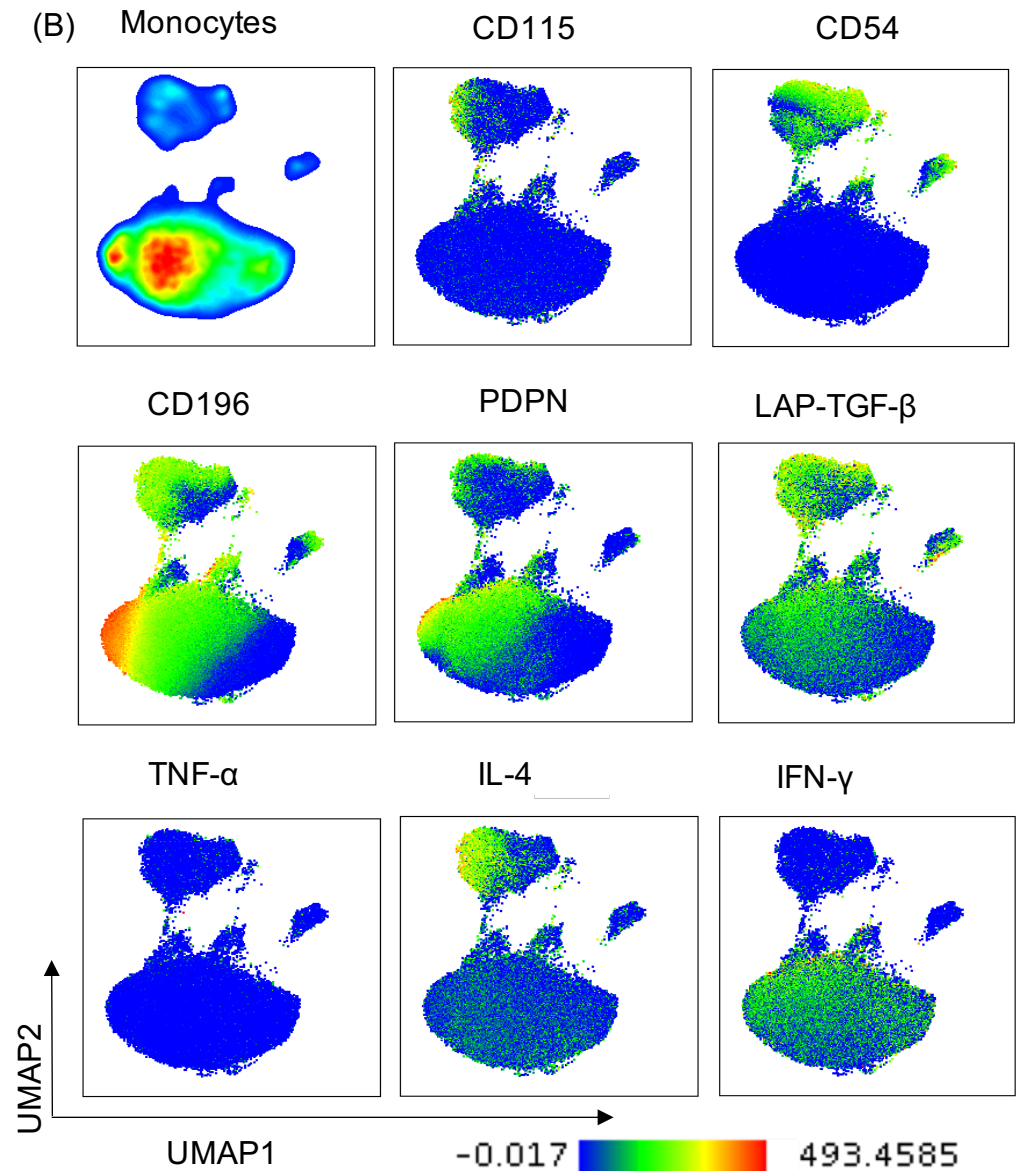

Supplement: NIHMS1735965-supplement-Suppl_Fig_5.pdf [file NIHMS1735965-supplement-Suppl_Fig_5.pdf]
