# Supplementary material
Source: PubMed Central journal article supplement (PMC8796698)

Differential expression analysis of circulatory murine monocyte during CDE diet-induced severe AP

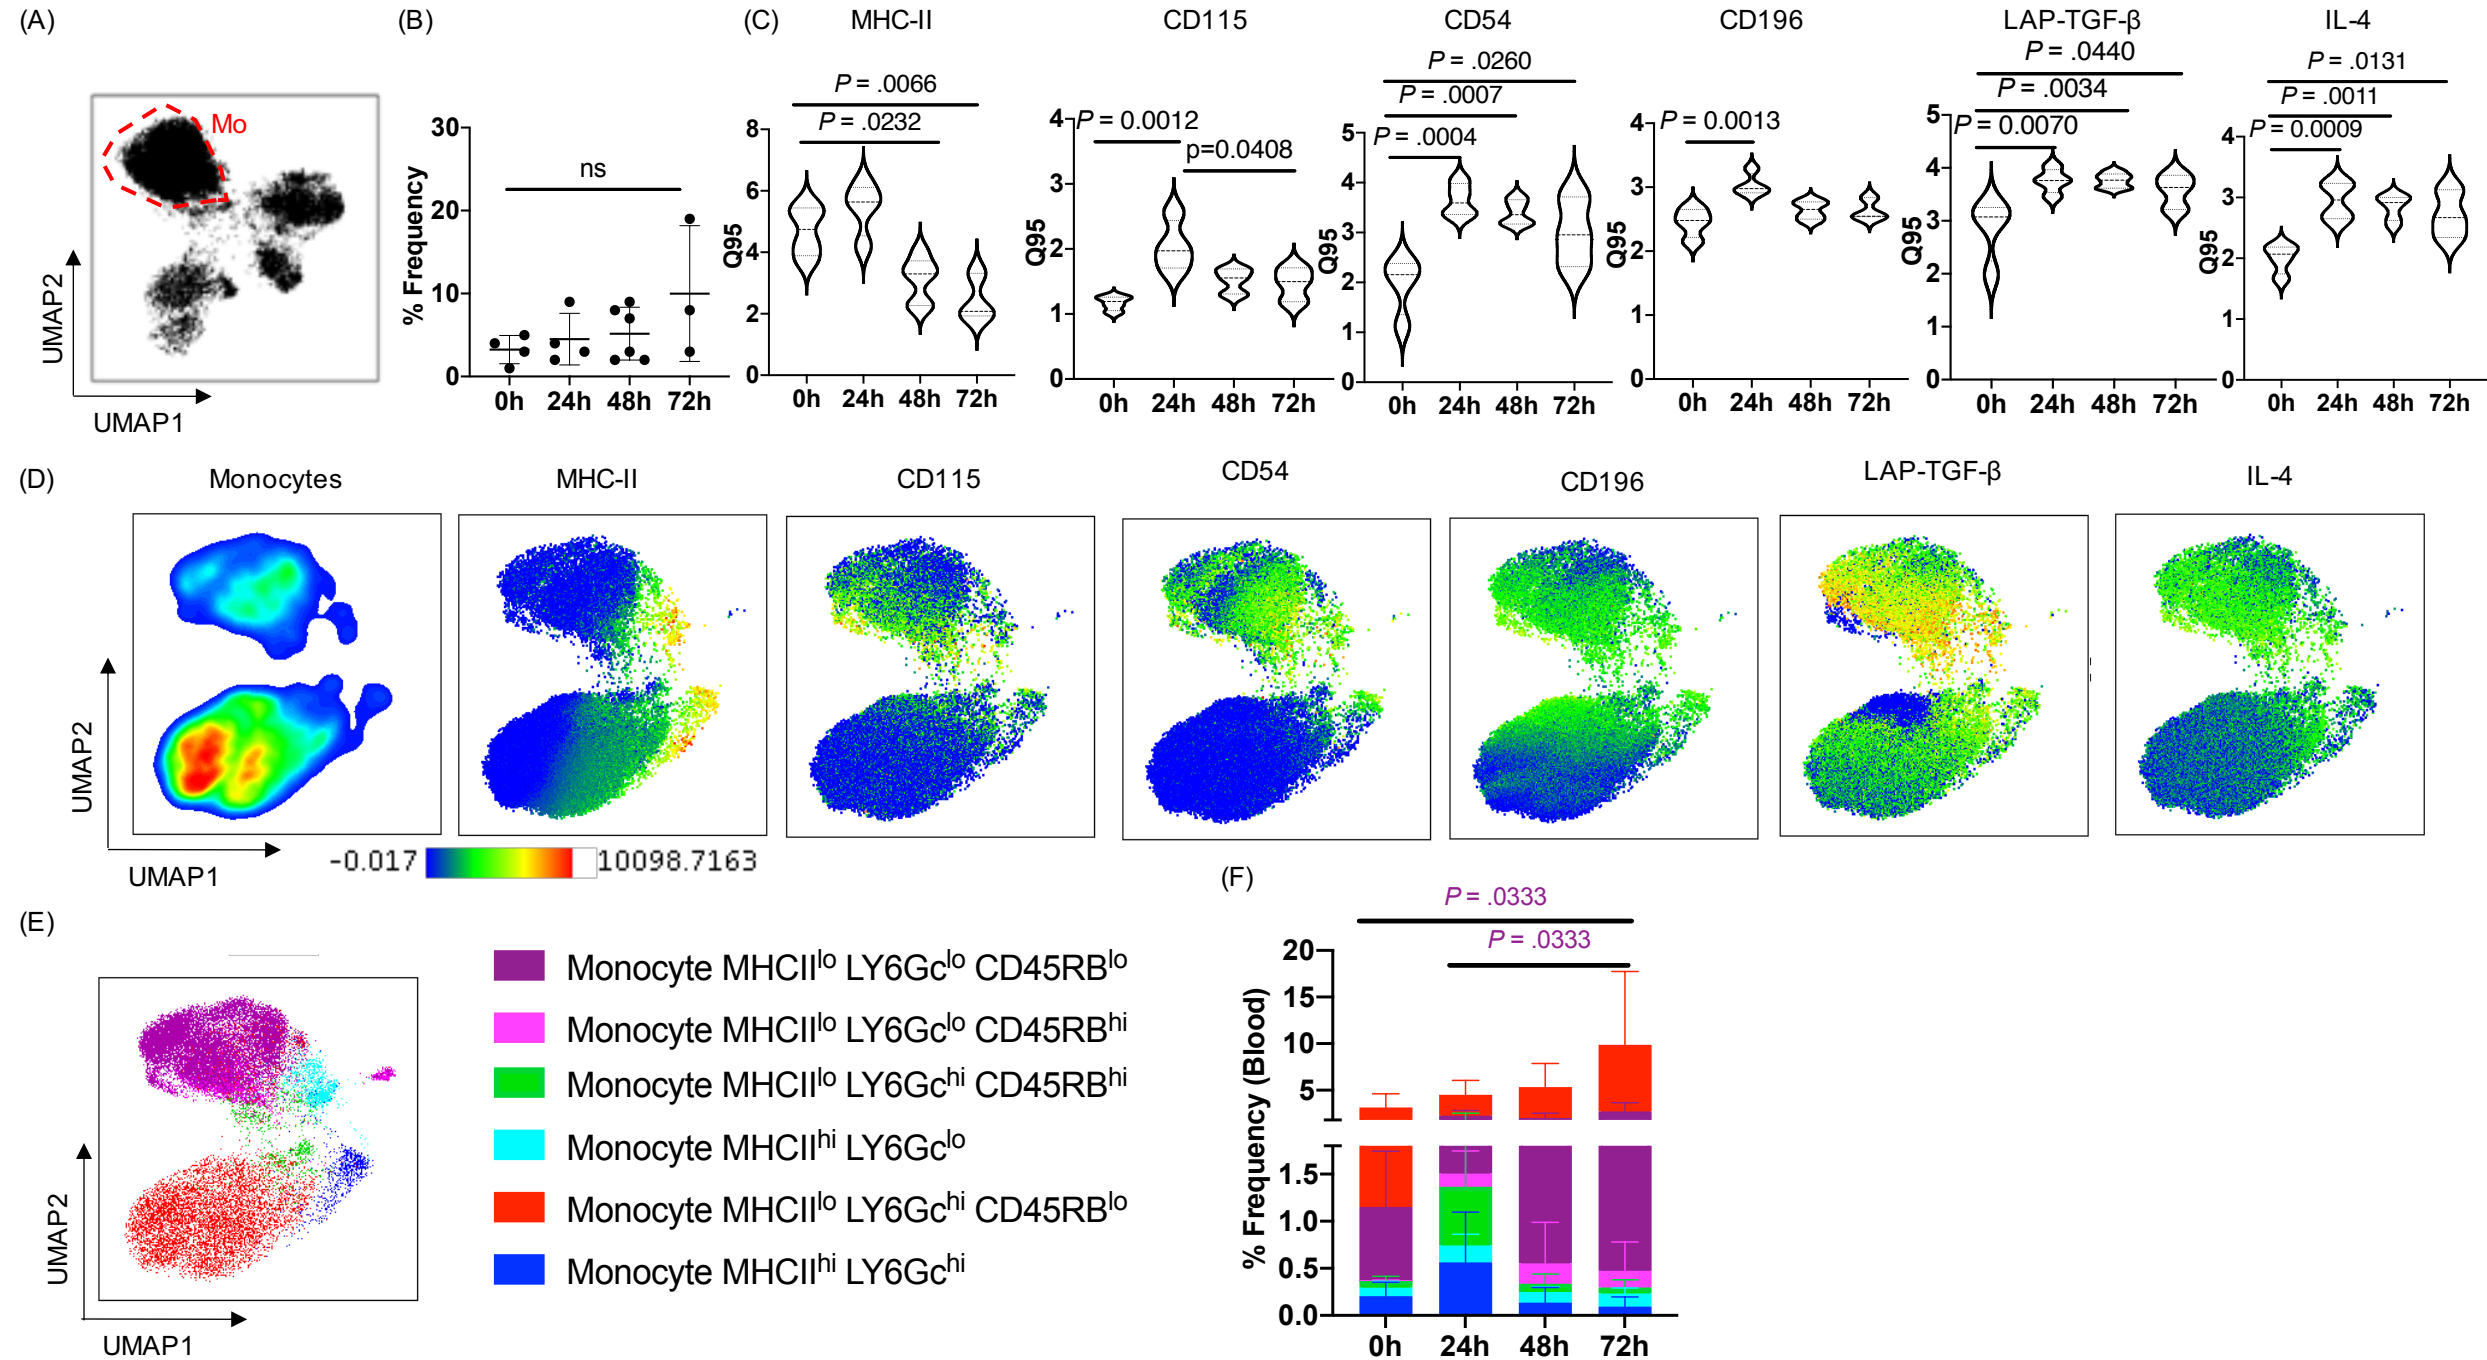

Supplement: NIHMS1735965-supplement-Suppl_Fig_6.pdf [file NIHMS1735965-supplement-Suppl_Fig_6.pdf]
