# Supplementary material
Source: PubMed Central journal article supplement (PMC8796698)

CytoF study of circulating monocytes in AP patients with gallstone and non-gallstone etiologies

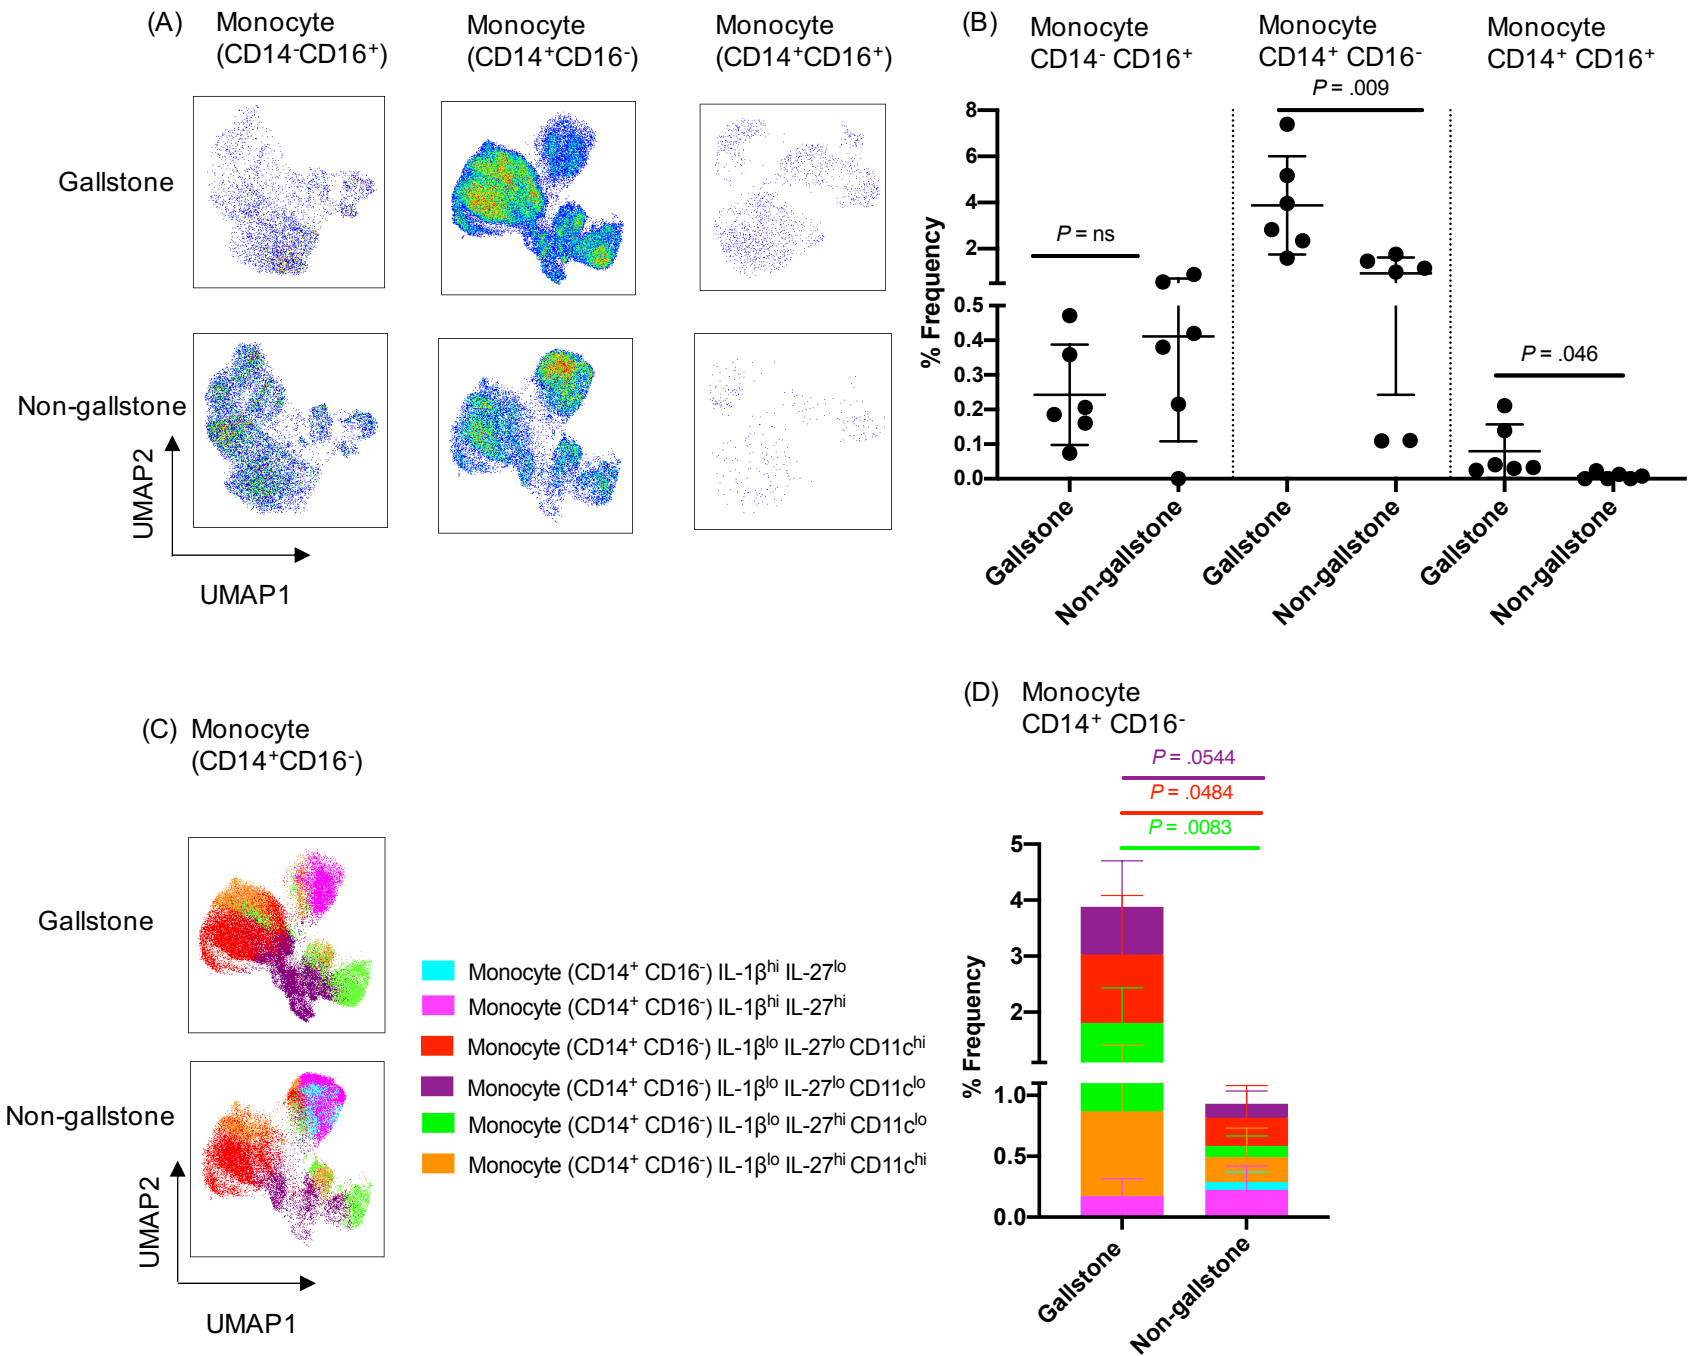

Supplement: NIHMS1735965-supplement-Suppl_Fig_7.pdf [file NIHMS1735965-supplement-Suppl_Fig_7.pdf]
