# Supplementary material
Source: PubMed Central journal article supplement (PMC8796698)

(A) CD206<sup>+</sup> macrophage

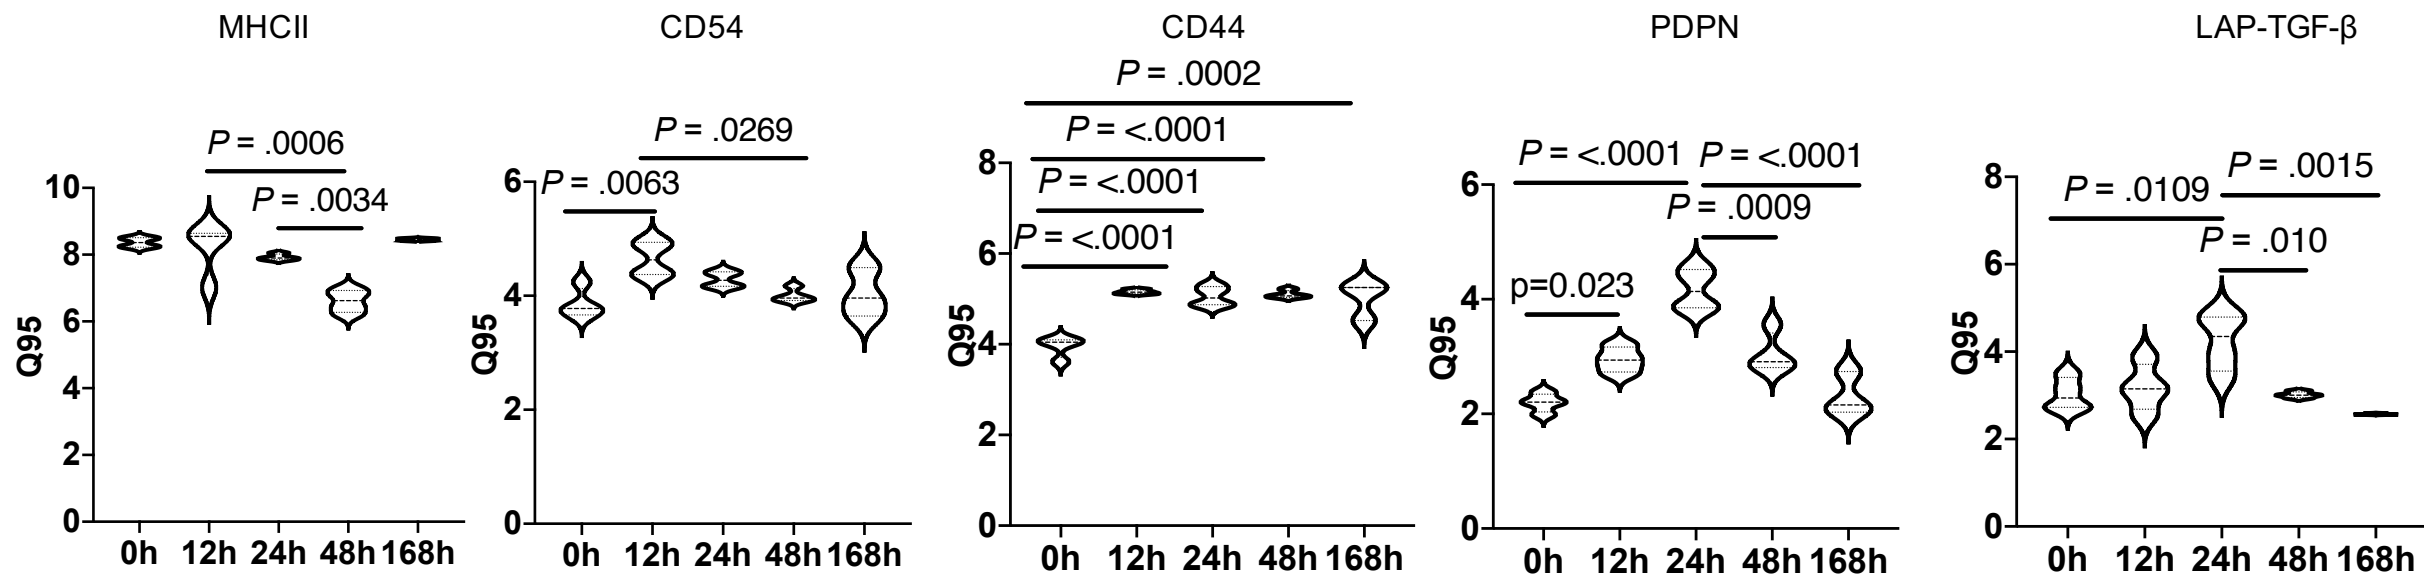

(B)

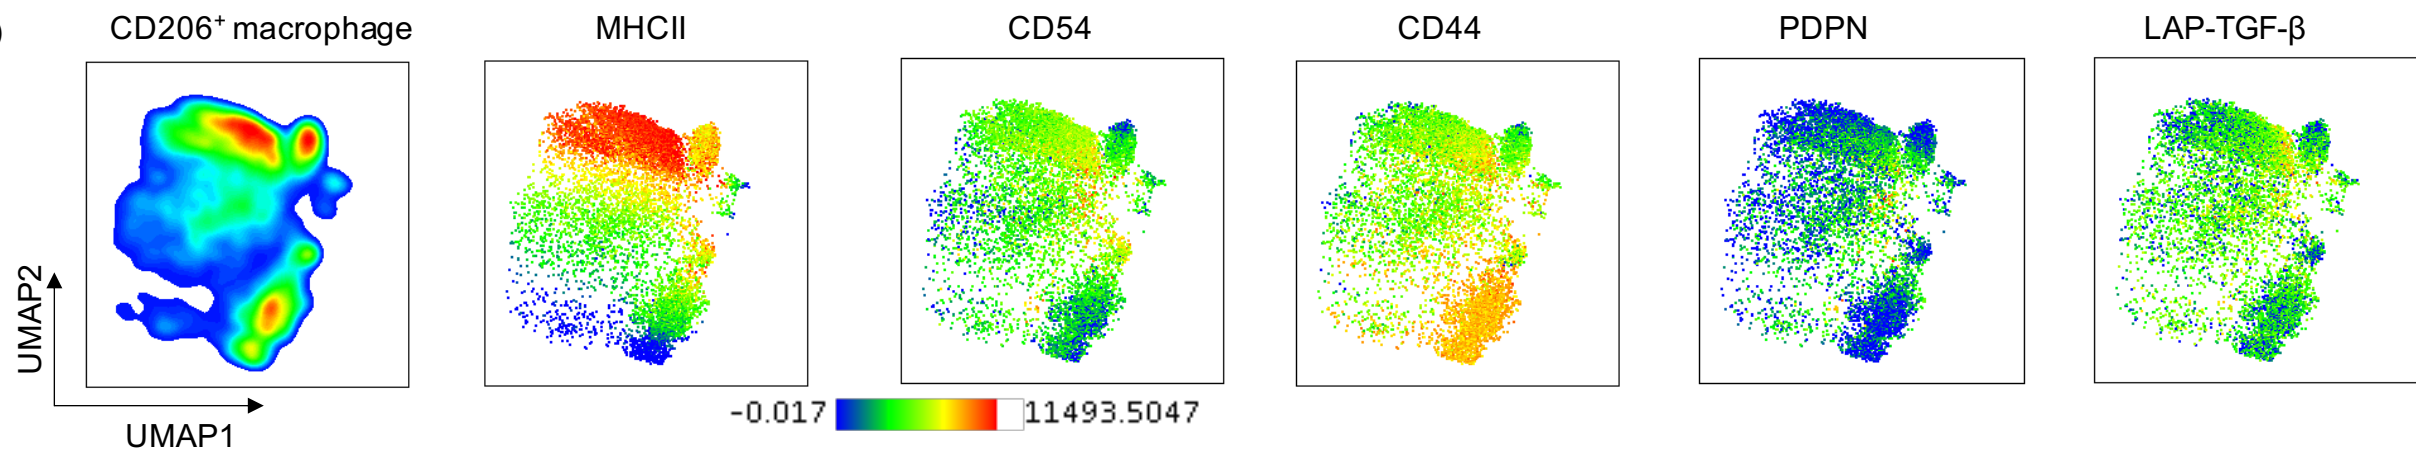

(C) (i)

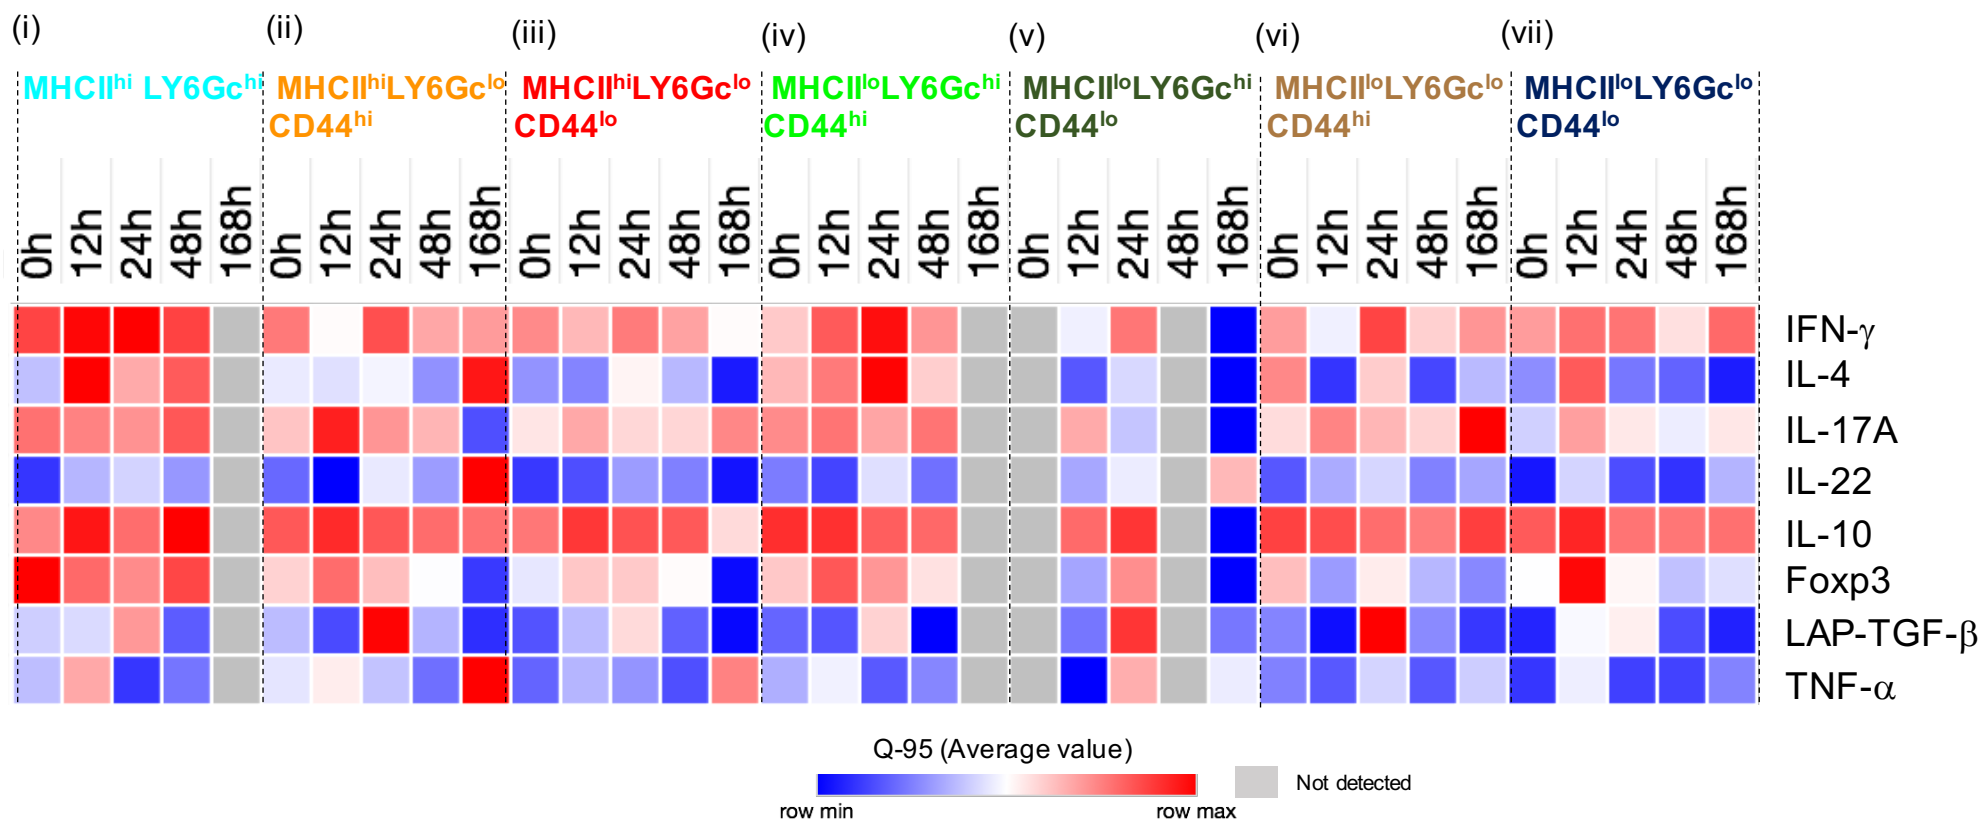

Supplement: NIHMS1735965-supplement-Suppl_Fig_3.pdf [file NIHMS1735965-supplement-Suppl_Fig_3.pdf]

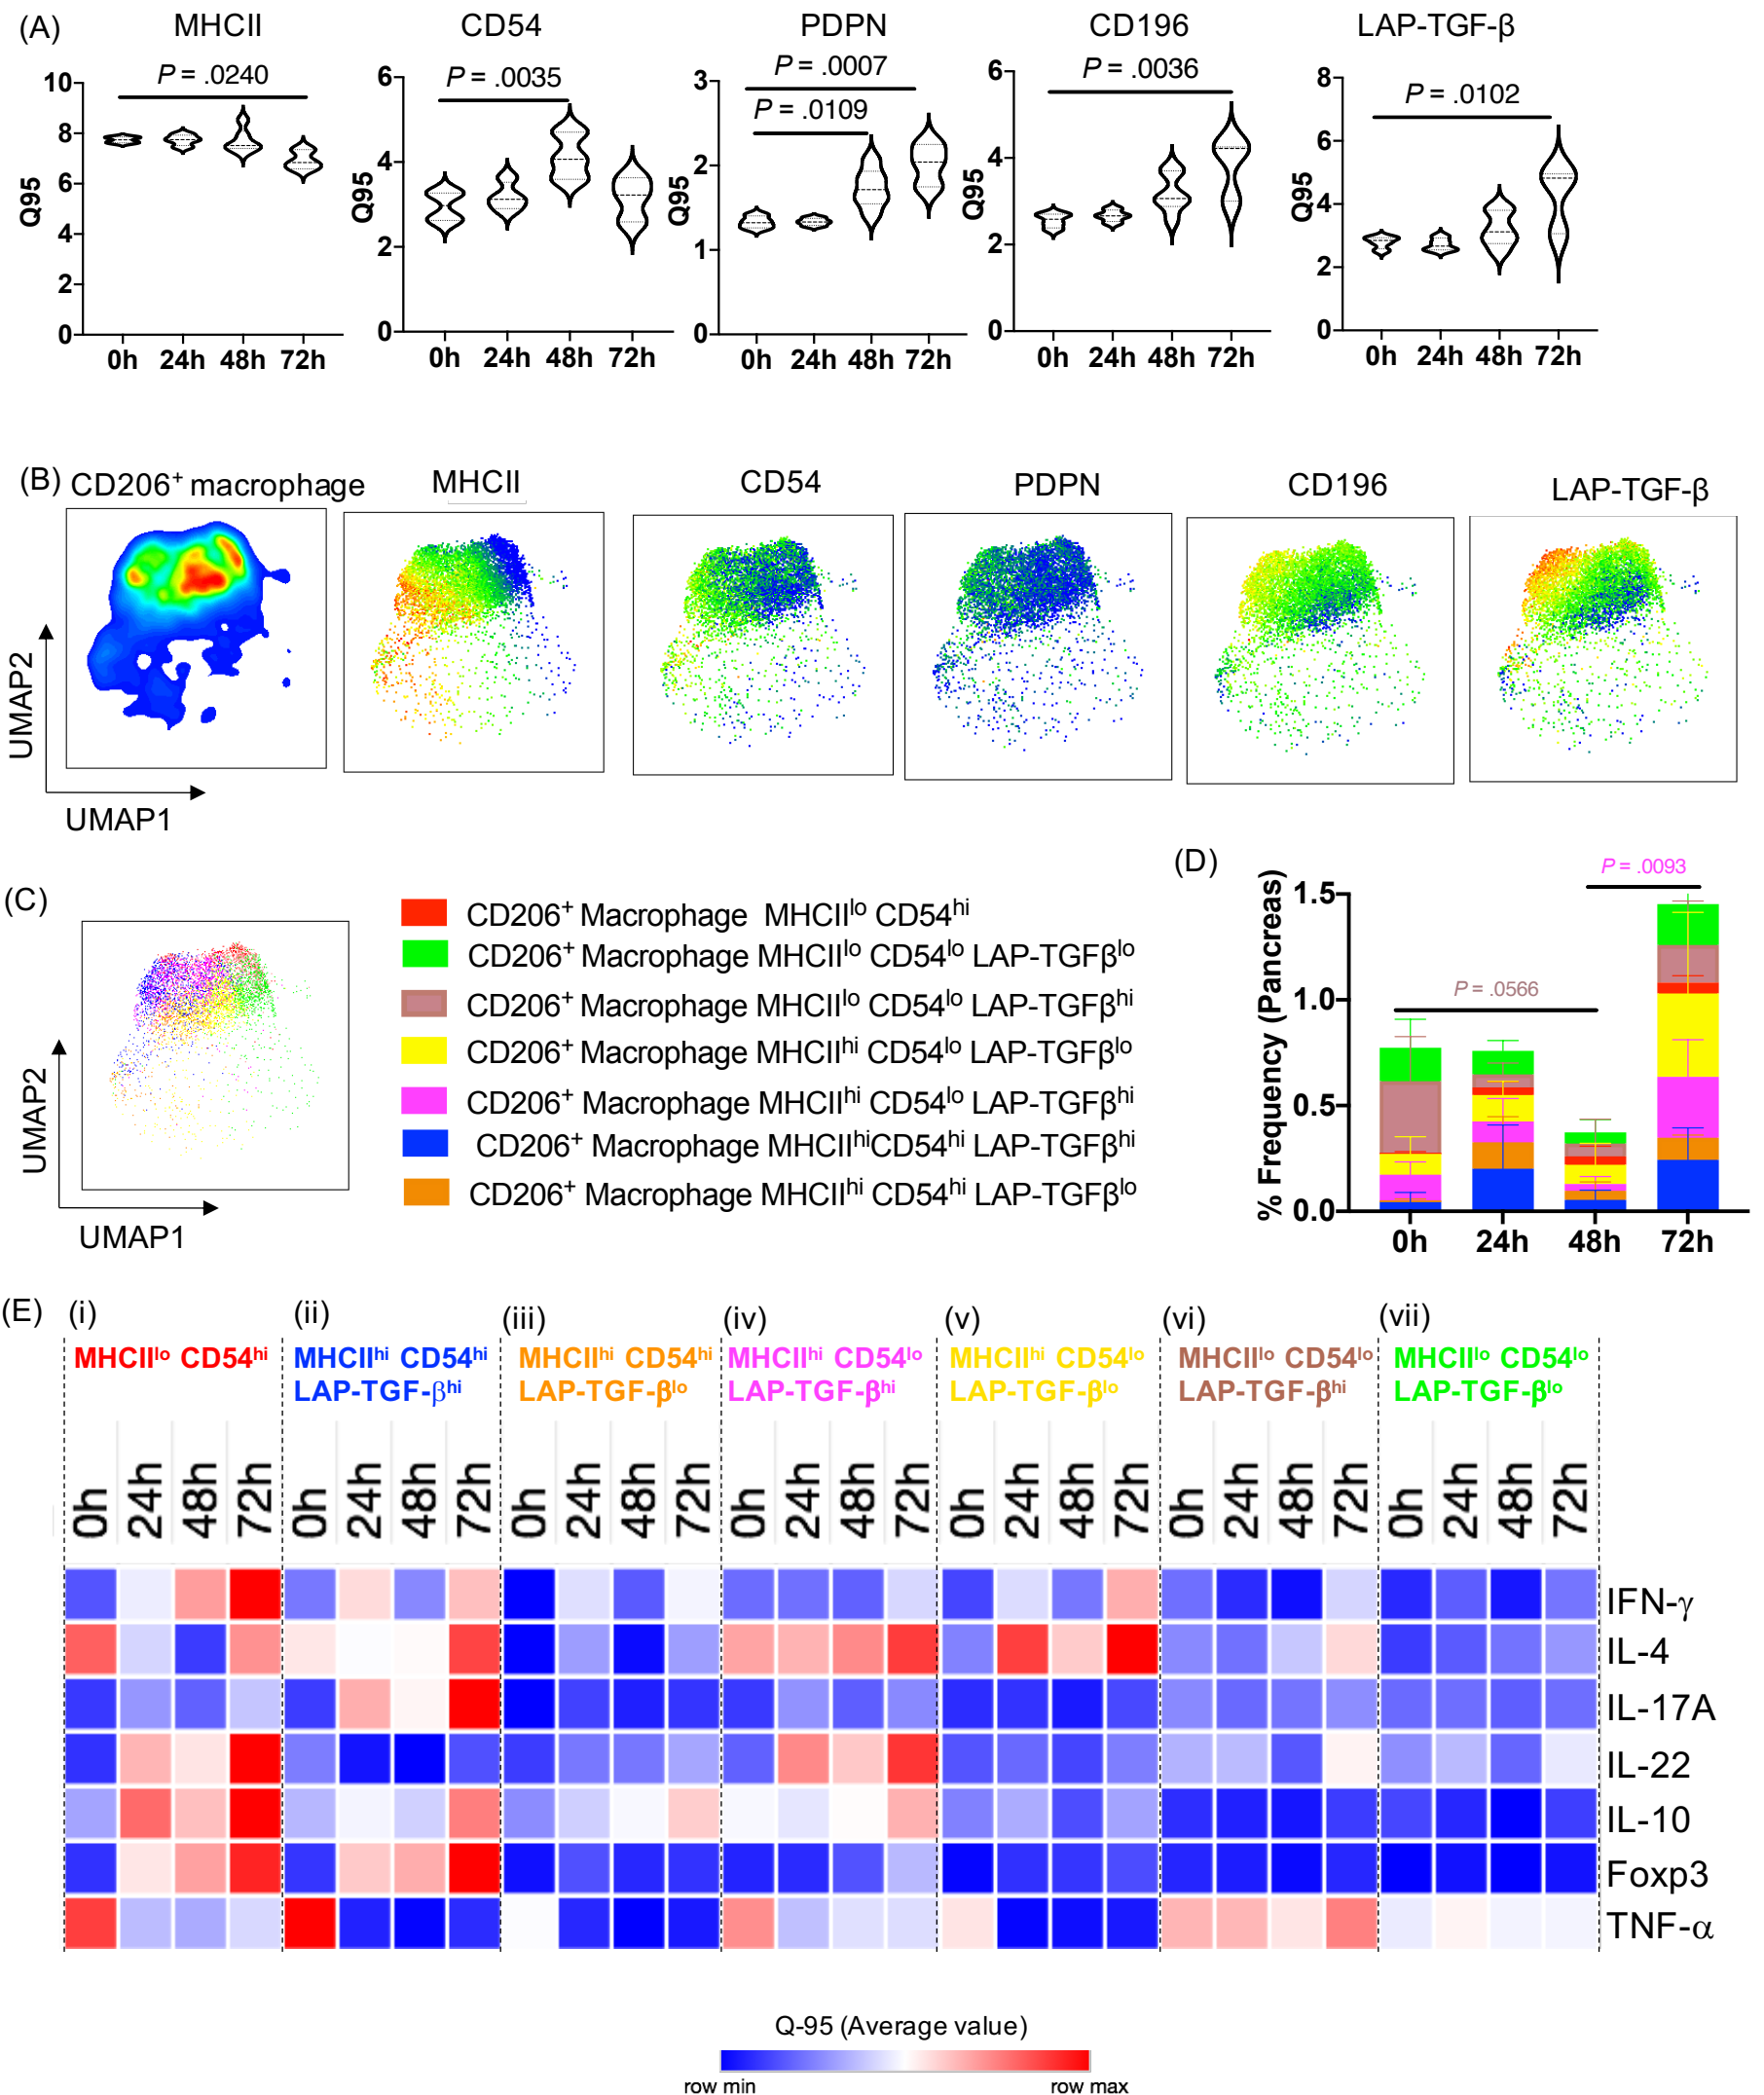

Supplement: NIHMS1735965-supplement-Suppl_Fig_4.pdf [file NIHMS1735965-supplement-Suppl_Fig_4.pdf]
